# Supplementary material for: The effect of allometric scaling in coral thermal microenvironments
Source: PLOS journal article supplement (doi:10.1371/journal.pone.0184214), 2017-10-12
Supplement: S14 (10.1371/journal.pone.0184214.s014) [file journal.pone.0184214.s014]

**S1 Table**

**List of symbols, their dimensions, and definitions.**

|                                |                             |                                |                            |
|--------------------------------|-----------------------------|--------------------------------|----------------------------|
| $\alpha$ [-]                   | tissue absorptivity         | $h$ [ $Wm^{-2}K^{-1}$ ]        | heat transfer coefficient  |
| $A$ [ $m^2$ ]                  | coral surface area          | $I$ [ $Wm^2$ ]                 | irradiance                 |
| $T_t$ [ $K$ ]                  | coral tissue temperature    | $T_f$ [ $K$ ]                  | ambient fluid temperature  |
| $\mathbf{U}$ [ $ms^{-1}$ ]     | superficial velocity vector | $\phi$ [%]                     | porosity                   |
| $\nu$ [ $m^2s^{-1}$ ]          | kinematic viscosity         | $\mu$ [ $Nsm^{-2}$ ]           | dynamic viscosity          |
| $\rho_c$ [ $kgm^3$ ]           | coral density               | $\rho_f$ [ $kgm^3$ ]           | fluid density              |
| $C_{p_c}$ [ $Jkg^{-1}K^{-1}$ ] | coral heat capacity         | $C_{p_f}$ [ $Jkg^{-1}K^{-1}$ ] | fluid heat capacity        |
| $k_c$ [ $Wm^{-1}K^{-1}$ ]      | coral thermal conductivity  | $k_f$ [ $Wm^{-1}K^{-1}$ ]      | fluid thermal conductivity |
| $\Gamma_{T_m}$ [ $m^2s^{-1}$ ] | medium thermal diffusivity  | $Pr$ [-]                       | Prandtl number             |
| $D$ [ $ms^{-1}$ ]              | Darcy's term                | $F$ [ $ms^{-1}$ ]              | Forchheimer's term         |
| $k$ [ $m^2s^{-2}$ ]            | turbulent kinetic energy    | $\omega$ [ $m^2s^{-3}$ ]       | specific dissipation rate  |
